# Supplementary material for: Exploring the chemical composition and coloring qualities of cacao fruit epicarp extracts
Source: Royal Society of Chemistry journal article supplement (doi:10.1039/d3ra01049j), 2023-01-01

SUPPLEMENTARY INFORMATION

## Exploring the chemical composition and coloring qualities of cacao fruit epicarp extracts

Jesús A. Oñate-Gutiérrez, Luis M. Díaz-Sánchez, Diana L. Urbina, Julio R. Pinzón, Cristian Blanco-Tirado<sup>†</sup> and Marianny Y. Combariza<sup>†\*</sup>

<sup>†</sup> Escuela de Química, Universidad Industrial de Santander, Bucaramanga, Santander, Colombia.

**Table S1.** Flavonoids identified in MALDI-TOF spectra of yellow CHE extract using DCTB, CNPV-CH<sub>3</sub> y CNPV-OCH<sub>3</sub> matrices

| Compound                       | DCTB | CNPV-CH <sub>3</sub> | CNPV-OCH <sub>3</sub> | Exp Mass | Mass accuracy | Isotopic pattern |                | S/N ratio |
|--------------------------------|------|----------------------|-----------------------|----------|---------------|------------------|----------------|-----------|
|                                |      |                      |                       |          |               | Calc             | Exp            |           |
| Phloretin                      | X    | X                    | X                     | 274.088  | 15            | 100:16.58:2.31   | 100:24.74:2.52 | 748       |
| Methylgalangin                 | X    | X                    | X                     | 284.083  | 53            | 100:17.63:2.49   | 100:17.40      | 29        |
| (+)-Catechin / (-)-epicatechin | X    |                      |                       | 290.068  | 37            | 100:16.61:2.53   | 100:14.28      | 83        |
| Quercetin                      | X    | X                    | X                     | 302.063  | 70            | 100:16.61:2.73   | 100:17.63:7.73 | 375       |
| Myricetin                      | X    | X                    | X                     | 318.030  | 22            | 100:16.64:2.94   | 100:24.62:2.77 | 648       |
| Jaceosidin                     | X    | X                    | X                     | 330.049  | 72            | 100:18.81:3.11   | 100:20.94      | 222       |
| Quercetin 3-O-arabinoside      | X    |                      |                       | 434.071  | 30            | 100:22.26:4.62   | 100:23.63:5.02 | 41        |
| Isorhamnetin 3-O-rutinoside    | X    |                      |                       | 462.096  | 43            | 100:24.47:5.12   | 100:29.68:12   | 29        |
| Luteolin 7-O-malonyl-glucoside | X    |                      |                       | 534.116  | 30            | 100:26.74:6.31   | 100:35.69      | 28        |
| Procyanidin dimer B1           | X    |                      |                       | 578.092  | 86            | 100:33.20:7.80   | 100:34.57:7.75 | 116       |

**Table S2.** Flavonoids identified in MALDI-TOF spectra of red CHE extract using DCTB, CNPV-CH<sub>3</sub> y CNPV-OCH<sub>3</sub> matrices

| Compound                               | DCTB | CNPV-<br>CH <sub>3</sub> | CNPV-<br>OCH <sub>3</sub> | Exp<br>Mass | Mass<br>accuracy | Isotopic pattern |                | S/N<br>ratio |
|----------------------------------------|------|--------------------------|---------------------------|-------------|------------------|------------------|----------------|--------------|
|                                        |      |                          |                           |             |                  | Calc             | Exp            |              |
| Phloretin                              | X    | X                        | X                         | 274.088     | 22               | 100:16.58:2.31   | 100:18.80:1.45 | 1405         |
| +) -Catechin /<br>(-) -epicatechin     | X    |                          |                           | 290.060     | 65               | 100:16.61:2.53   | 100:12.47      | 128          |
| Quercetin                              | X    | X                        | X                         | 302.063     | 70               | 100:16.61:2.73   | 100:16.87      | 466          |
| Myricetina                             | X    | X                        | X                         | 318.030     | 22               | 100:16.64:2.94   | 100:17.86:1.75 | 912          |
| Jaceosidin                             | X    | X                        | X                         | 330.048     | 76               | 100:18.81:3.11   | 100:18.04      | 233          |
| Quercetin-3-O-<br>arabinoside          | X    |                          |                           | 434.036     | 110              | 100:22.26:4.62   | 100:23.46:5.54 | 37           |
| Luteolin 7-O-<br>malonyl-<br>glucoside | X    |                          |                           | 534.099     | 2                | 100:26.74:6.31   | 100:30.79      | 48           |
| Procyanidin<br>dimer B1                | X    |                          |                           | 578.130     | 21               | 100:33.20:7.80   | 100:33.60:6.38 | 195          |
| Luteolin 7-O-<br>rutinoside            | X    |                          |                           | 594.123     | 59               | 100:30.12:7.46   | 100:31.69      | 104          |
| Apigenin 7-O-<br>diglucuronide         | X    |                          |                           | 622.160     | 69               | 100:30.15:7.88   | 100:41.25:15.5 | 50           |

**Table S3.** Flavonoids identified in MALDI-TOF spectra of purple CHE extract using DCTB, CNPV-CH<sub>3</sub> y CNPV-OCH<sub>3</sub> matrices

| Compound                                                                | DCT<br>B | CNPV<br>-CH <sub>3</sub> | CNPV<br>-OCH <sub>3</sub> | Exp<br>Mass | Mass<br>accurac<br>y | Isotopic pattern   |                    | S/N<br>rati<br>o |
|-------------------------------------------------------------------------|----------|--------------------------|---------------------------|-------------|----------------------|--------------------|--------------------|------------------|
|                                                                         |          |                          |                           |             |                      | Calc               | Exp                |                  |
| Phloretin                                                               | X        | X                        | X                         | 274.08<br>2 | 15                   | 100:16.58:2.3<br>1 | 100:13.72:1.1<br>7 | 721              |
| Methylgalangin                                                          | X        |                          |                           | 284.08<br>6 | 63                   | 100:17.63:2.4<br>9 | 100:16.80          | 34               |
| Hispidulin                                                              | X        |                          |                           | 300.06<br>8 | 17                   | 100:17.67:2.7<br>0 | 100:17.00          | 18               |
| Quercetin                                                               | X        | X                        | X                         | 302.05<br>9 | 56                   | 100:16.61:2.7<br>3 | 100:13.05          | 269              |
| Myricetin                                                               | X        | X                        | X                         | 318.04<br>7 | 31                   | 100:16.64:2.9<br>4 | 100:16.4:3.94      | 415              |
| Jaceosidin                                                              | X        | X                        |                           | 330.04<br>3 | 91                   | 100:18.81:3.1<br>1 | 100:14.73          | 141              |
| 5,3',4'-Trihydroxy-3-methoxy-6:7-methylenedioxyflavone 4'-O-glucuronide |          |                          | X                         | 520.10<br>0 | 29                   | 100:25.64:6.0<br>3 | 100:33.52          | 22               |
| 6''-O-Malonylglycitin                                                   |          |                          | X                         | 532.12<br>1 | 116                  | 100:27.81:6.3<br>9 | 100:45.73          | 13               |
| Procyanidin dimer B1                                                    | X        |                          |                           | 578.17<br>8 | 62                   | 100:33.20:7.8<br>0 | 100:31.20          | 28               |

**Figure S1.** MALDI-TOF spectra of yellow CHE extract using DCTB, CNPV-CH<sub>3</sub> and CNPV-OCH<sub>3</sub> matrices

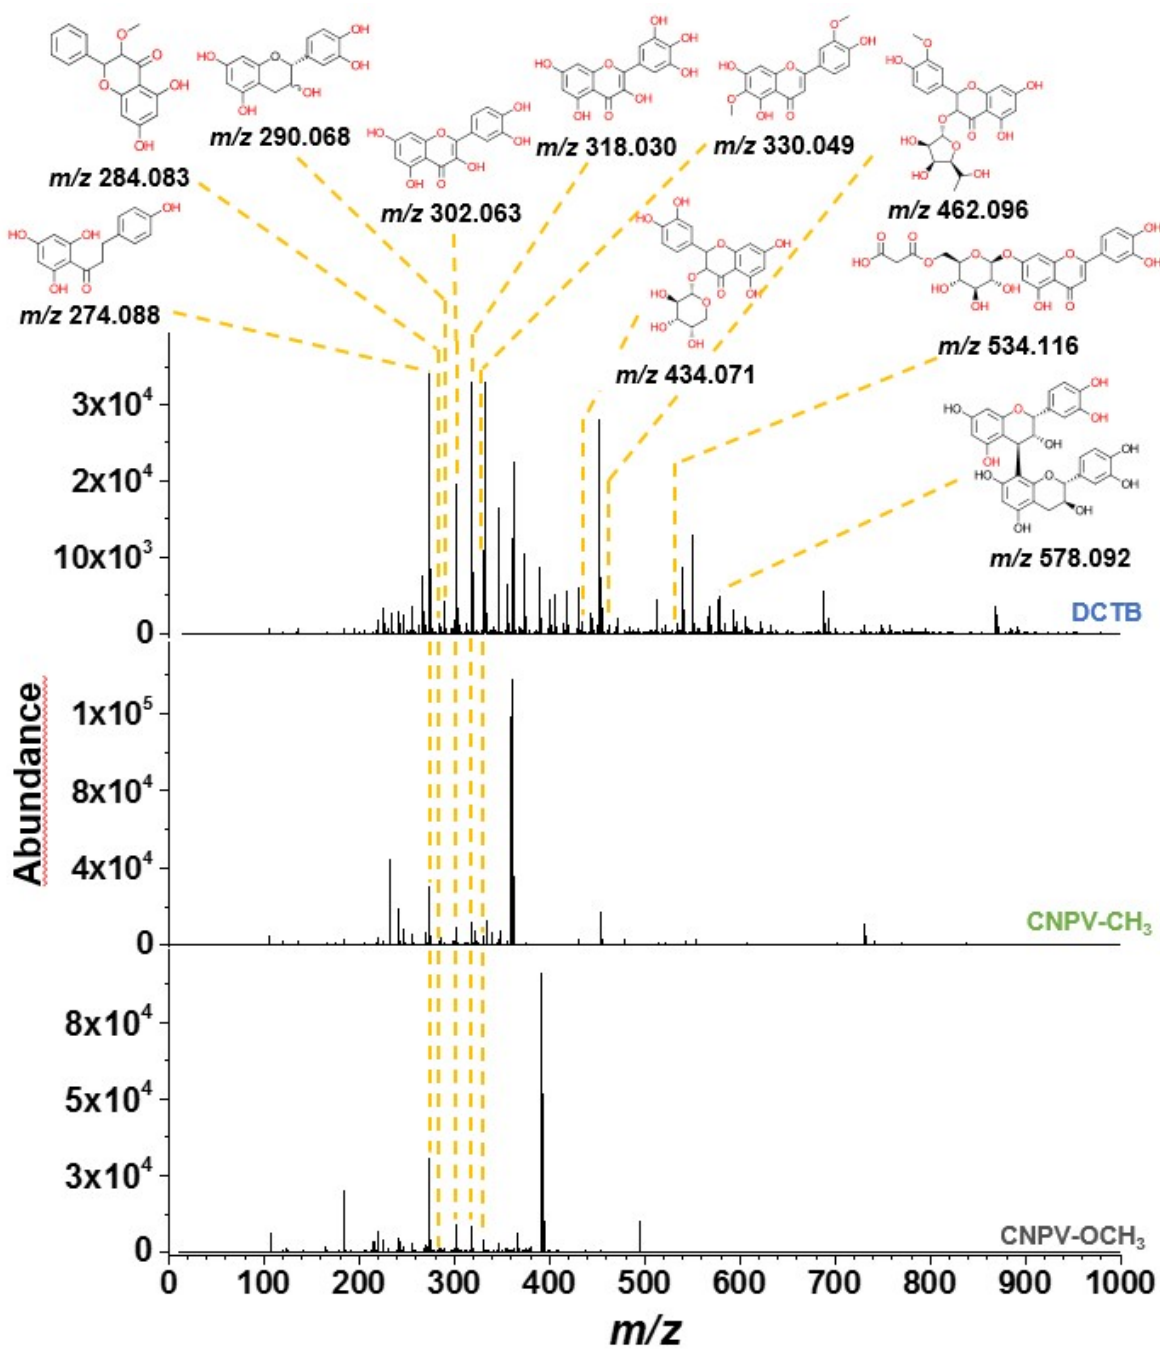

**Figure S2.** MALDI-TOF spectra of red CHE extract using DCTB, CNPV-CH<sub>3</sub> and CNPV-OCH<sub>3</sub> matrices

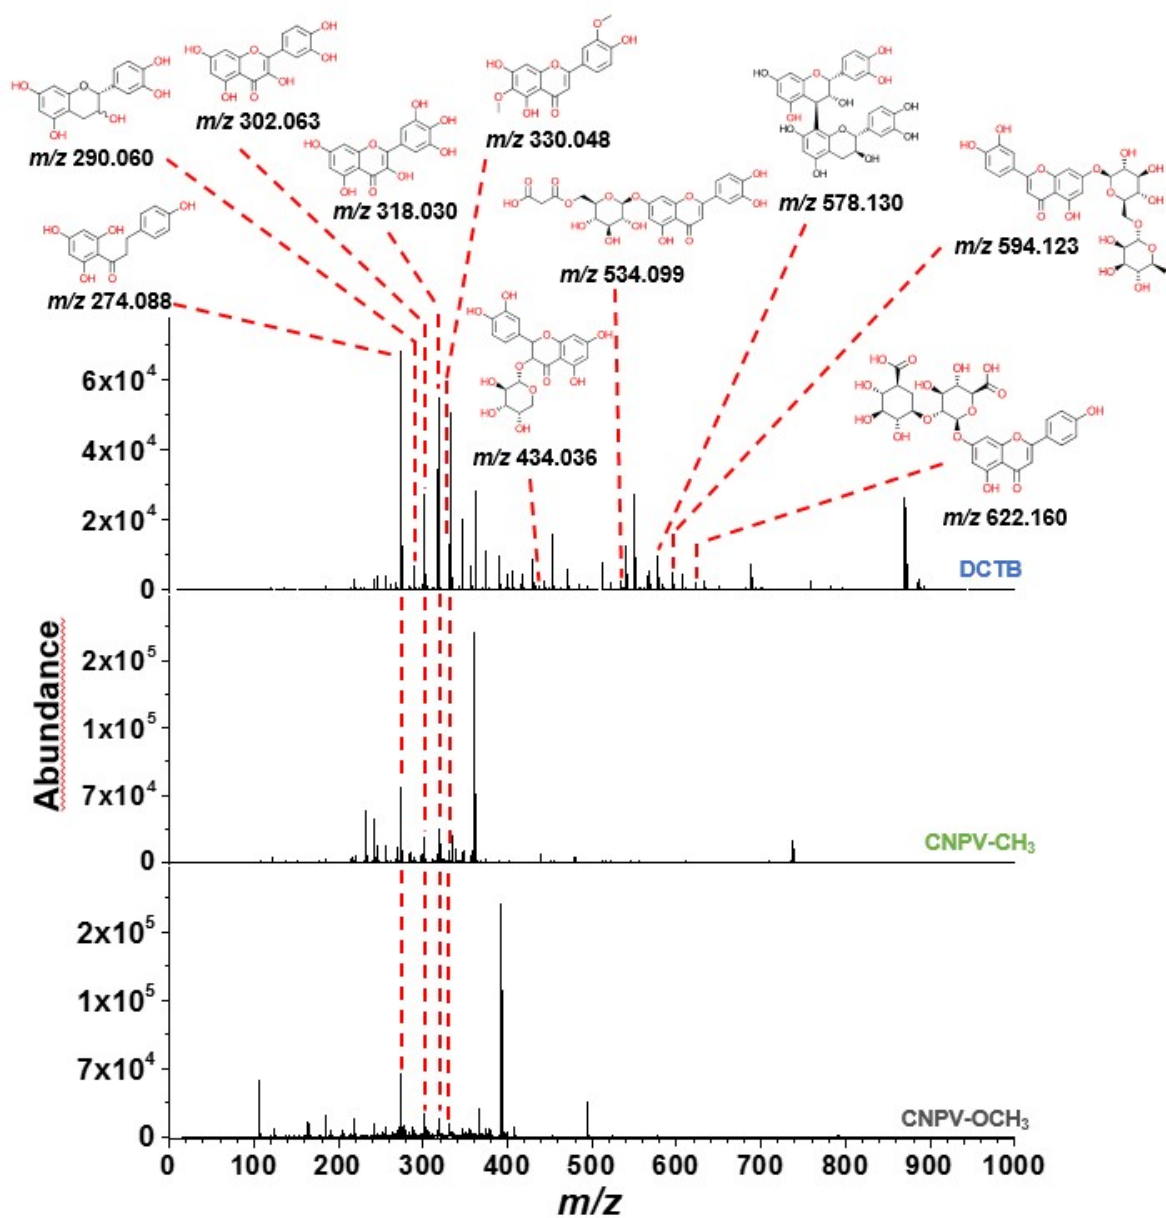

**Figure S3.** MALDI-TOF spectra of purple CHE extract using DCTB, CNPV-CH<sub>3</sub> and CNPV-OCH<sub>3</sub> matrices

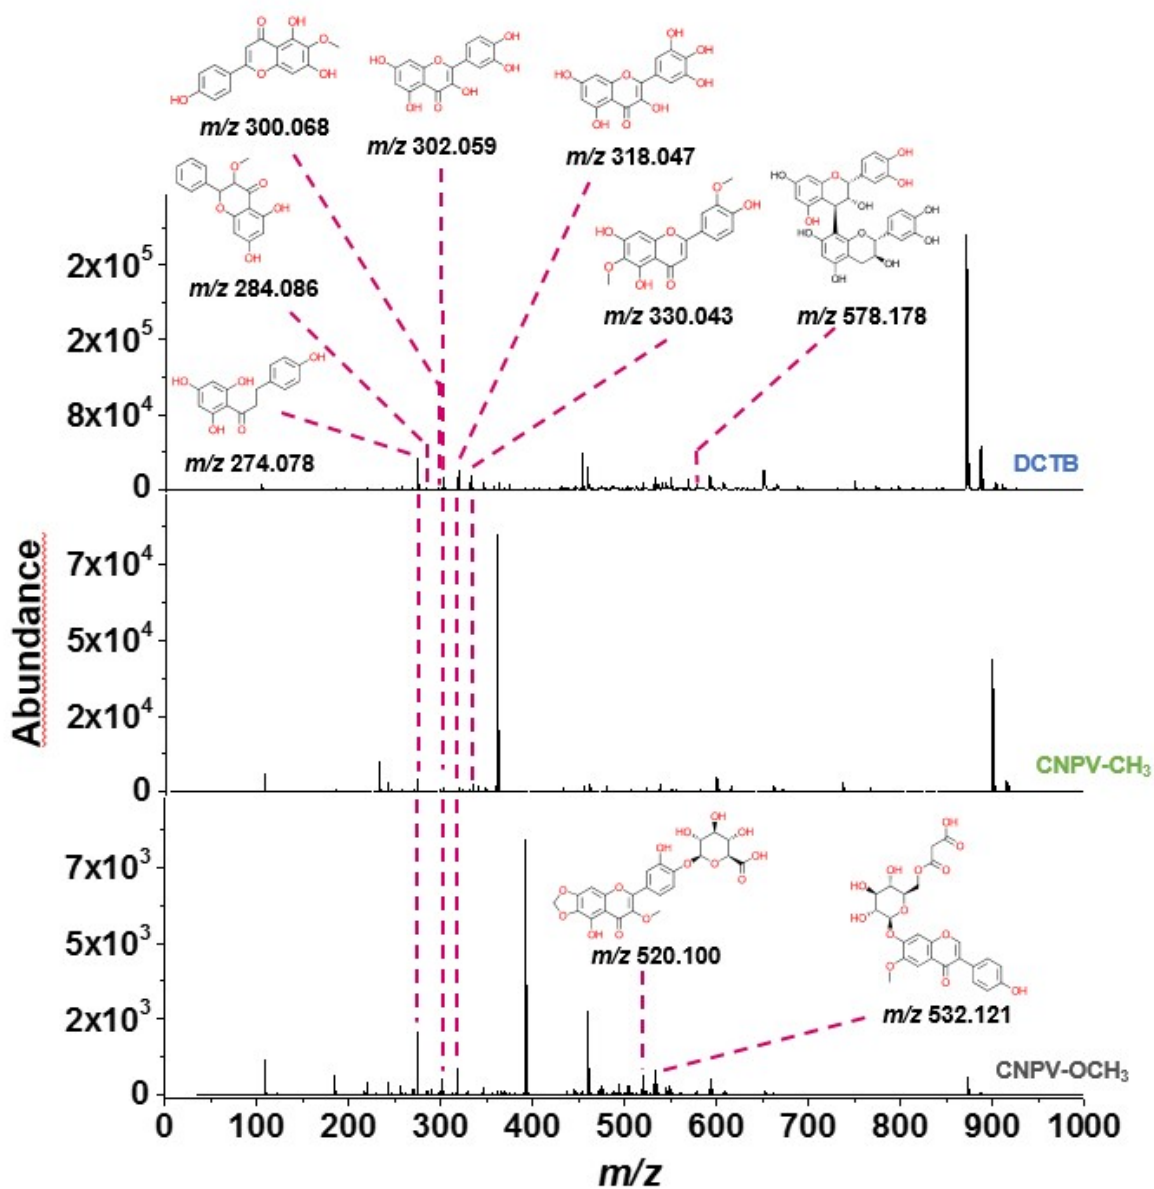

Supplement: d3ra01049j1.pdf [file d3ra01049j1.pdf]
